# Supplementary material for: Controlling surface cation segregation in a nanostructured double perovskite GdBaCo2O5+δ electrode for solid oxide fuel cells
Source: Royal Society of Chemistry journal article supplement (doi:10.1039/c9nr04734d), 2019-01-01
Supplement: c9nr04734d1.pdf [file c9nr04734d1.pdf]

## Supplementary Information

### Controlling Surface Cation Segregation in Nanostructured Double Perovskite $\text{GdBaCo}_2\text{O}_{5+\delta}$ Electrode for Solid Oxide Fuel Cells

Uzma Anjum<sup>1</sup>, Manish Agarwal<sup>2</sup>, Tuhin Suvra Khan<sup>1</sup>, Prateek<sup>3</sup>, Raju Kumar Gupta<sup>3,4</sup>, M. Ali Haider<sup>1\*</sup>

<sup>1</sup>Renewable Energy and Chemicals Laboratory, Chemical Engineering Department, Indian Institute of Technology Delhi, New Delhi, India

<sup>2</sup>Computer Services Center, Indian Institute of Technology Delhi, New Delhi, India

<sup>3</sup>Department of Chemical Engineering, Indian Institute of Technology Kanpur, Kanpur, Uttar Pradesh, India

<sup>4</sup>Center for Environmental Science and Engineering, Indian Institute of Technology Kanpur, Kanpur, Uttar Pradesh, India

\*Corresponding Author: [haider@iitd.ac.in](mailto:haider@iitd.ac.in)

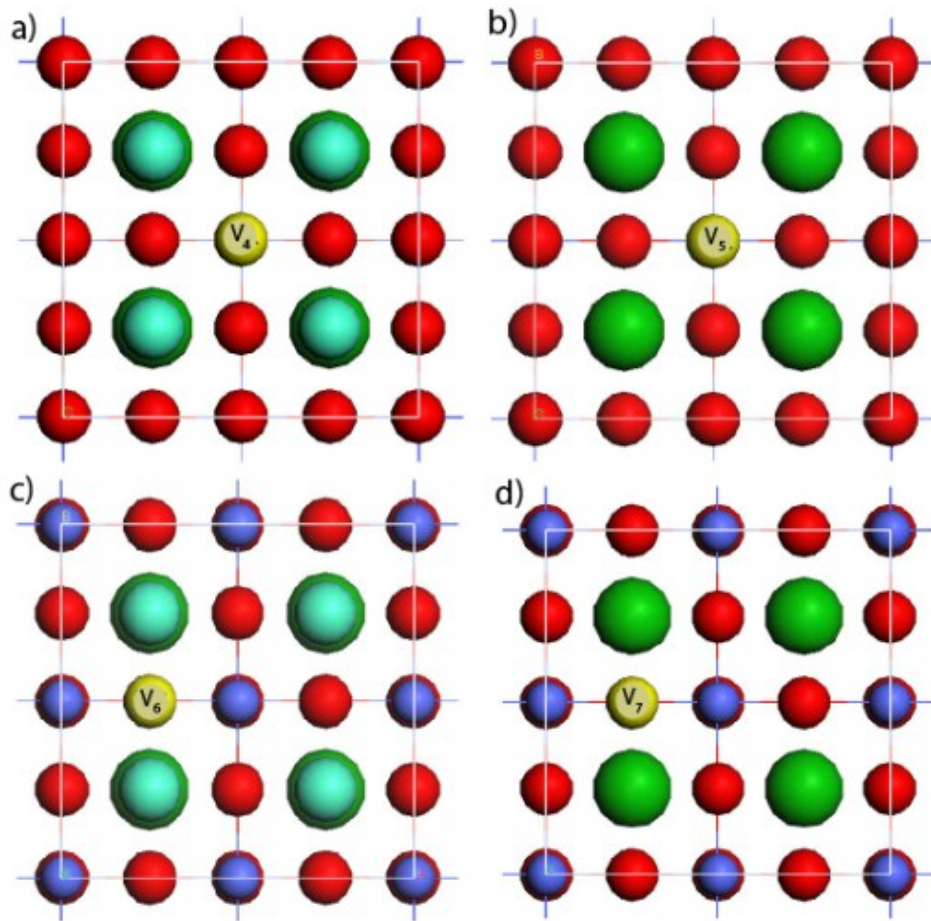

**Figure S1 :** Top view of a) Gd/Co, b) Ba/Co, c) Co/Gd, and d) Co/Ba terminal surfaces of GBCO lattice structure along (001) direction denoted as (cation present at surface / cation present at sub-surface). Gd, Ba, Co and O atoms are represented as sky blue, green, dark blue and red color respectively

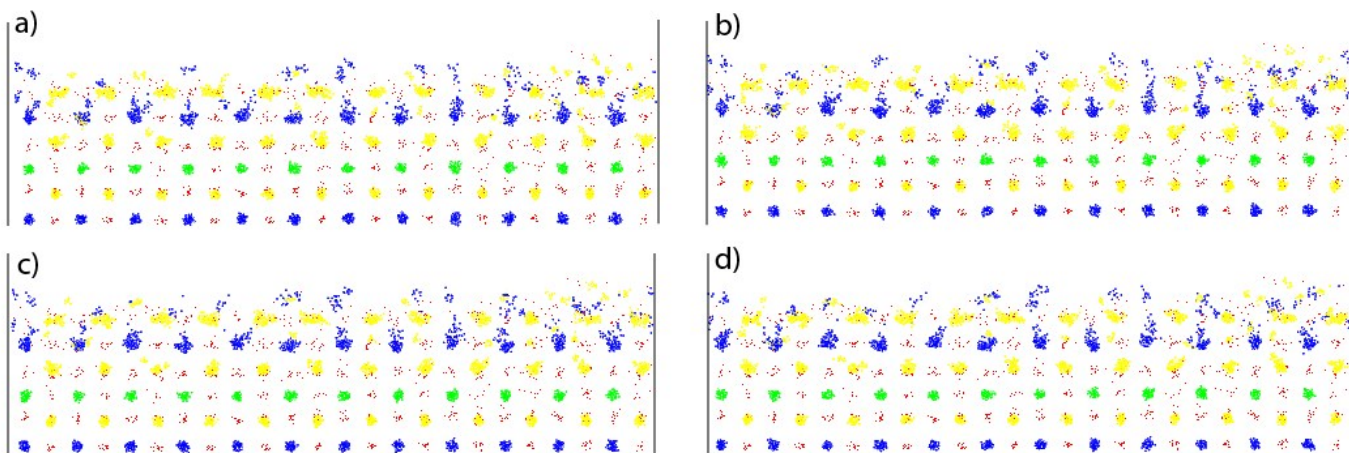

**Figure S2:** (a)-(d) Snapshots of the cation density profile of Co/Ba terminal surface of GBCO structure at the interval of every 10ps. Gd, Ba, Co and O atoms are represented as green, blue, yellow and red color respectively.

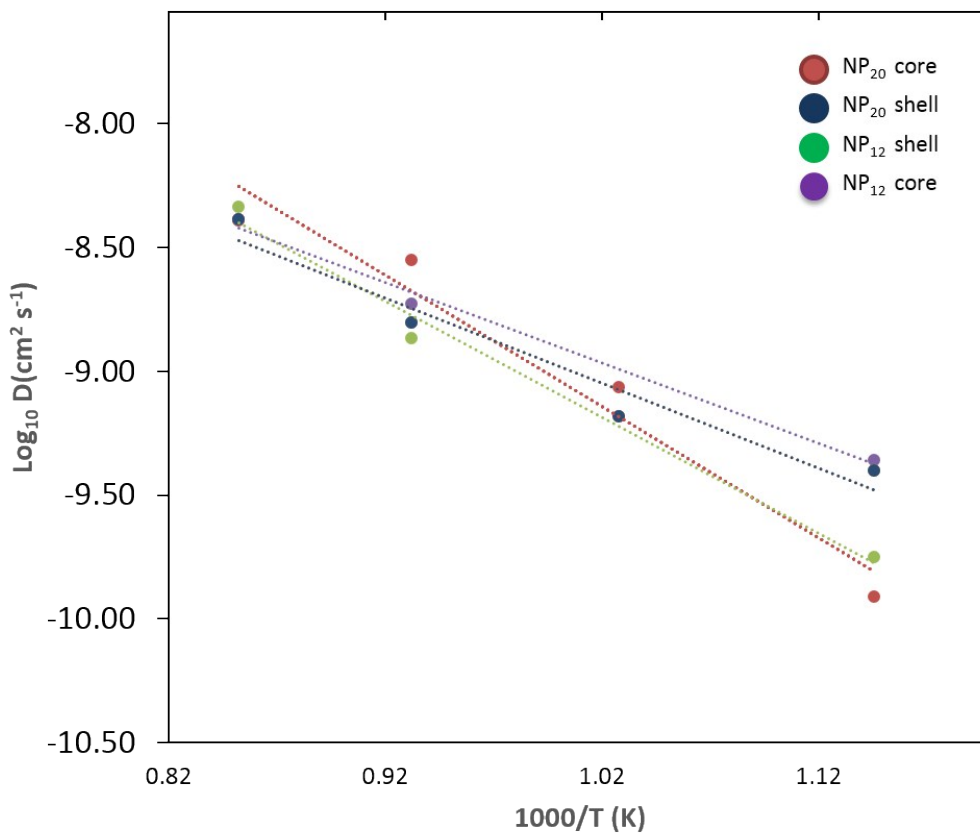

**Figure S3:** Arrhenius plot of core and shell diffusivity value for NP<sub>20</sub> and NP<sub>12</sub> nanoparticle for temperature range of 873 K-1173K

**Table S1:** Buckingham potential parameters

| Interaction                       | $A_{ij}$ /eV | $\rho_{ij}$ /Å | $C_{ij}$ /eV Å |
|-----------------------------------|--------------|----------------|----------------|
| Gd <sup>+3</sup> -O <sup>-2</sup> | 1458.38      | 0.3522         | 0.0            |
| Ba <sup>+2</sup> -O <sup>-2</sup> | 1214.39      | 0.3537         | 0.00           |
| Co <sup>+3</sup> -O <sup>-2</sup> | 1329.82      | 0.3087         | 0.00           |
| O <sup>-2</sup> - O <sup>-2</sup> | 22764.3      | 0.149          | 43.00          |
